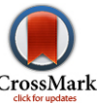

# An Association of Genotypes and Antimicrobial Resistance Patterns among *Salmonella* Isolates from Pigs and Humans in Taiwan

Hung-Chih Kuo<sup>1</sup>, Tsai-Ling Lauderdale<sup>2</sup>, Dan-Yuan Lo<sup>1</sup>, Chiou-Lin Chen<sup>1</sup>, Pei-Chen Chen<sup>2</sup>, Shiu-Yun Liang<sup>3</sup>, Jung-Che Kuo<sup>3</sup>, Ying-Shu Liao<sup>3</sup>, Chun-Hsing Liao<sup>3</sup>, Chi-Sen Tsao<sup>3</sup>, Chien-Shun Chiou<sup>3\*</sup>

**1** Department of Veterinary Medicine, National Chiayi University, Chiayi, Taiwan, **2** National Health Research Institutes, Miaoli, Taiwan, **3** Centers for Disease Control, Taichung, Taiwan

## Abstract

We collected 110 *Salmonella enterica* isolates from sick pigs and determined their serotypes, genotypes using pulsed-field gel electrophoresis (PFGE), and antimicrobial susceptibility to 12 antimicrobials and compared the data with a collection of 18,280 isolates obtained from humans. The pig isolates fell into 12 common serovars for human salmonellosis in Taiwan; *S. Typhimurium*, *S. Choleraesuis*, *S. Derby*, *S. Livingstone*, and *S. Schwarzengrund* were the 5 most common serovars and accounted for a total of 84% of the collection. Of the 110 isolates, 106 (96%) were multidrug resistant (MDR) and 48 (44%) had PFGE patterns found in human isolates. *S. Typhimurium*, *S. Choleraesuis*, and *S. Schwarzengrund* were among the most highly resistant serovars. The majority of the 3 serovars were resistant to 8–11 of the tested antimicrobials. The isolates from pigs and humans sharing a common PFGE pattern displayed identical or very similar resistance patterns and *Salmonella* strains that caused severe infection in pigs were also capable of causing infections in humans. The results indicate that pigs are one of the major reservoirs to human salmonellosis in Taiwan. Almost all of the pig isolates were MDR, which highlights the necessity of strictly regulating the use of antimicrobials in the agriculture sector in Taiwan.

**Citation:** Kuo H-C, Lauderdale T-L, Lo D-Y, Chen C-L, Chen P-C, et al. (2014) An Association of Genotypes and Antimicrobial Resistance Patterns among *Salmonella* Isolates from Pigs and Humans in Taiwan. PLoS ONE 9(4): e95772. doi:10.1371/journal.pone.0095772

**Editor:** Jan Kluytmans, Amphia Ziekenhuis, Netherlands

**Received:** February 24, 2014; **Accepted:** March 30, 2014; **Published:** April 23, 2014

**Copyright:** © 2014 Kuo et al. This is an open-access article distributed under the terms of the Creative Commons Attribution License, which permits unrestricted use, distribution, and reproduction in any medium, provided the original author and source are credited.

**Funding:** This study was supported by a grant (DOH101-DC-2201) from the Centers for Disease Control, Ministry of Health and Welfare, Taiwan. The funders had no role in study design, data collection and analysis, decision to publish, or preparation of the manuscript.

**Competing Interests:** The authors have declared that no competing interests exist.

\* E-mail: nipmcs@cdc.gov.tw

## Introduction

Non-typhoidal *Salmonella* (NTS) is a zoonotic foodborne pathogen that is found worldwide. It is estimated to cause 93.8 million cases of gastroenteritis and 155,000 deaths each year worldwide and approximately 86% of these cases are the result of foodborne infections [1]. In the United States, NTS is responsible for approximately 1 million episodes of salmonellosis each year among all foodborne illnesses that are caused by 31 known pathogens [2]. Domestic and wild animals are the primary reservoirs of NTS. Food animals, including poultry, pigs, and cattle, are the key reservoirs for human salmonellosis [3]. In recent decades, the antimicrobial resistance of NTS has become a large threat to public health. The emergence of antimicrobial resistance and the transmission of resistant strains from animals to humans are mostly associated with the nontherapeutic use of various classes of antimicrobials in large quantities in food animals [4].

Pulsed-field gel electrophoresis (PFGE) is the gold standard molecular subtyping method in differentiating bacterial strains for disease outbreak investigation and disease surveillance. A number of PFGE protocols are standardized for foodborne bacterial pathogens and have been applied to a national foodborne disease surveillance network in the United States [5] and an expanded global surveillance network [6]. The PFGE data generated using a standardized protocol are comparable among laboratories for

outbreak investigation and real time disease surveillance and are useful for tracking reservoirs of *Salmonella* infection in humans. Sandt et al. [7] have demonstrated the application of PFGE data for tracking food animal reservoirs for human infections. By comparing PFGE data and antimicrobial susceptibility patterns of *Salmonella* isolates from humans and food animals, they have shown that chickens are major contributors to human salmonellosis in the northeastern United States.

In Taiwan, the burden of salmonellosis in humans, including the number of episodes, hospitalizations, and deaths, has not yet been systematically investigated. From a previously conducted survey administered by our laboratory, we estimate that a total of at least 10,000 *Salmonella* isolates could be recovered each year in the hospitals across Taiwan, a country with a population of 23 million people. The number of isolates suggests that Taiwan could have more than 200,000 episodes of salmonellosis each year, as estimated based on the figures from the United States [2,8]. The burden of salmonellosis in Taiwan is attributable not only to high incidence rates but also to the high prevalence of multidrug resistance (MDR, resistance to three or more classes of antimicrobial agents) in *Salmonella* strains. Lauderdale et al. [9] showed that several *Salmonella* serovars obtained in Taiwan between 1998 and 2002 displayed a high prevalence of MDR. A comparison study also indicated that *S. Typhimurium* isolates from Taiwan displayed significantly higher levels of antimicrobial resistance

than those from Denmark [10]. In the study, cluster G of which the majority were MDR could be unique to Taiwan. To investigate the epidemiological trend of salmonellosis in Taiwan, the *Salmonella* reference laboratory at Taiwan's Centers for Disease Control (TCDC) has begun to collect *Salmonella* isolates from hospitals since 2004 and has performed serotyping, PFGE genotyping, and antimicrobial susceptibility testing for these isolates. To date, more than 20,000 *Salmonella* isolates have been characterized. A database with a large number of *Salmonella* PFGE and antimicrobial susceptibility data is a useful platform for tracking the animal reservoirs of MDR *Salmonella* strains. In this study, we compared the PFGE and antimicrobial susceptibility patterns of *Salmonella* isolates from pigs and humans to investigate whether pigs are major animal reservoirs for human salmonellosis in Taiwan.

## Materials and Methods

### Bacterial isolates

A total of 110 *Salmonella* isolates were recovered from specimens obtained from sick pigs in central and southern Taiwan between 2011 and 2012. The sick pigs were sent to the Veterinary Teaching Hospital of National Chiayi University for pathological diagnosis and necropsy. No animal was killed for the purposes of this study. The specimens were taken from extraintestinal sites, including abscess, bile, joint fluid, liver, lung, and tonsil samples. Human *Salmonella* isolates were collected from a total of 51 hospitals across Taiwan from 2004 to 2012 in the operation of PulseNet Taiwan, a molecular subtyping system for the surveillance of foodborne diseases run by the TCDC. The human isolates were subjected to routine serotyping and PFGE genotyping for detecting disease clusters. The collection of human isolates was approved by the Institutional Review Board of Centers for Disease Control and the institutional review board waived the need for informed consent. All of the data were managed using the computer software BioNumerics version 6.6 (Applied Maths; Kortrijk, Belgium).

### PFGE genotyping

Isolates were subjected to PFGE analysis using the standardized PulseNet PFGE protocol for the subtyping of *Salmonella* and certain other enterobacteria [11]. PFGE images were digitally recorded in tiff file format using a Kodak EDAS290 System (Eastman Kodak Co, Rochester, NY, USA).

### Antimicrobial susceptibility testing (AST)

*Salmonella* isolates were examined for susceptibility to 12 antimicrobials using the microbroth dilution method and custom-made 96-well Sensititre MIC panels (TREK Diagnostic Systems LTD., West Essex, England). Human isolates collected between 2004 and 2010 were tested at the National Health Research Institute, and human isolates collected in 2011 and 2012 and 110 pig isolates were tested at the TCDC. The test procedure was performed according to the manufacturer's instructions. The 12 tested antimicrobials included ampicillin, cefotaxime, ceftazidime, chloramphenicol, ciprofloxacin, gentamicin, imipenem, nalidixic acid, streptomycin, sulfamethoxazole, tetracycline, and trimethoprim/sulfamethoxazole. The criteria of the Clinical and Laboratory Standards Institute (CLSI) [12] were used to interpret the MIC results of the antimicrobial response except for streptomycin: MIC  $\geq 64$   $\mu\text{g/ml}$ , MIC = 32  $\mu\text{g/ml}$ , and MIC  $\leq 16$   $\mu\text{g/ml}$  were used to define resistance, intermediate resistance, and susceptibility, respectively.

### Data analysis

PFGE images were analyzed using the fingerprint analysis software BioNumerics version 6.6 (Applied Maths). A PFGE genotype was defined as a PFGE pattern with one or more differential DNA bands present compared to other genotypes. The PFGE patterns were saved in a *Salmonella* database that also contains information regarding serovar, AST, and demographic data for the isolates. The genetic relatedness among the 110 pig isolates was established by cluster analysis of the PFGE patterns using the Dice coefficients, and the unweighted pair group method with an arithmetic mean algorithm and the optimization value and position tolerance were set at 1.56% and 0.75%, respectively.

## Results

### Comparison of serovars and PFGE genotypes

A total of 18,280 human isolates were collected from hospitals across the country between 2004 and 2012. The isolates belonged to 93 serovars and 2,779 PFGE genotypes. *S. Enteritidis*, *S. Typhimurium*, *S. Stanley*, *S. Newport*, and *S. Albany* were the 5 most common serovars (Table 1), and they accounted for 70% of the entire collection. The 110 pig isolates fell into 12 serovars and 44 PFGE types. All of the 12 serovars were among the 40 most common serovars for the human isolates (Table 1). *S. Typhimurium*, *S. Choleraesuis*, *S. Derby*, *S. Livingstone* var. 14+, and *S. Schwarzengrund* were the 5 most common serovars, accounting for 84% of all of the pig isolates. Of the pig isolates, 48 (44%) had PFGE patterns found in the human isolates. Nineteen (43%) of the 44 PFGE types found in the pig isolates were also detected in the human isolates. Each of the 12 serovars had at least one PFGE type that was also found in the human isolates.

### Antimicrobial resistance in pig isolates

All but 4 pig isolates were MDR and were resistant to 3 or more classes of antimicrobials (Figure 1). Of the 110 isolates, 48 (44%) were resistant to cefotaxime, 37 (34%) to ceftazidime, 0 (0%) to imipenem, 56 (51%) to nalidixic acid, 23 (21%) to ciprofloxacin, 68 (62%) to gentamicin, 103 (94%) to ampicillin, 94 (85%) to chloramphenicol, 76 (69%) to streptomycin, 107 (97%) to sulfamethoxazole, 101 (92%) to tetracycline, and 83 (75%) to trimethoprim/sulfamethoxazole. *S. Choleraesuis*, *S. Schwarzengrund*, and *S. Typhimurium* isolates displayed the highest resistance profiles. *S. Choleraesuis* isolates were resistant to 8–11 antimicrobials tested (Figure 1). All *S. Choleraesuis* isolates were resistant to ciprofloxacin, and 80% were resistant to cefotaxime. *S. Schwarzengrund* isolates were resistant to 7–8 antimicrobials. All *S. Schwarzengrund* isolates were ciprofloxacin-resistant and 5 of the 7 isolates were resistant to cefotaxime. *S. Typhimurium* isolates fell into two distinct clusters: PA and PB. The majority of isolates in cluster PA were resistant to 3–6 antimicrobials; however, all of the isolates except one in cluster PB were resistant to 8 or more antimicrobials. The majority of isolates in cluster PB were resistant to cefotaxime and ceftazidime and exhibited resistance or reduced susceptibility to ciprofloxacin. By clustering these isolates with 378 *S. Typhimurium* isolates characterized in a previous study [10], all but 3 isolates in cluster PA belonged to the cluster C group, which was defined in the previous study as resistant to ampicillin, streptomycin, sulfonamide, and tetracycline (ASSuT). All but one of the isolates in cluster PB belonged to the previously designated cluster G in which the majority of isolates are resistant to 5 or more antimicrobials. The pig isolates belonging to cluster G were resistant to 8–11 antimicrobials. The isolate BL44 in cluster PB belonged to the previously designated cluster F, which is typically resistant to ASSuT and chloramphenicol (ACSSuT).

**Table 1.** *Salmonella* isolates from humans and pigs.

| Serotype              | Human         |                | Pig                       |                             |
|-----------------------|---------------|----------------|---------------------------|-----------------------------|
|                       | No. isolates  | No. PFGE types | No. isolates (No. shared) | No. PFGE types (No. shared) |
| Enteritidis           | 5124          | 193            |                           |                             |
| Typhimurium           | 4184          | 683            | 53 (13)                   | 20 (6)                      |
| Stanley               | 1531          | 113            | 2 (2)                     | 1 (1)                       |
| Newport               | 1254          | 228            | 3 (2)                     | 2 (1)                       |
| Albany                | 722           | 172            | 5 (1)                     | 1 (1)                       |
| Agona                 | 645           | 94             |                           |                             |
| Paratyphi B var. Java | 547           | 113            |                           |                             |
| Weltevreden           | 504           | 217            |                           |                             |
| Derby                 | 452           | 99             | 9 (2)                     | 4 (1)                       |
| Bareilly              | 365           | 32             |                           |                             |
| Braenderup            | 363           | 52             |                           |                             |
| Schwarzengrund        | 325           | 115            | 7 (2)                     | 2 (1)                       |
| Virchow               | 295           | 47             |                           |                             |
| Choleraesuis          | 276           | 63             | 15 (7)                    | 7 (2)                       |
| Hadar                 | 247           | 49             | 2 (1)                     | 1 (1)                       |
| Potsdam               | 146           | 42             |                           |                             |
| Mbandaka              | 137           | 39             |                           |                             |
| Montevideo            | 116           | 23             |                           |                             |
| Blockley              | 98            | 14             |                           |                             |
| Infantis              | 81            | 22             |                           |                             |
| Anatum                | 80            | 25             | 3 (2)                     | 2 (1)                       |
| Itami                 | 62            | 10             |                           |                             |
| Typhi                 | 56            | 35             |                           |                             |
| Livingstone var. 14+  | 52            | 9              | 8 (8)                     | 2 (2)                       |
| London                | 46            | 21             | 2 (2)                     | 1 (1)                       |
| Cerro                 | 41            | 7              |                           |                             |
| Litchfield            | 40            | 14             |                           |                             |
| Saintpaul             | 39            | 18             |                           |                             |
| Illa 18:z4,z23:-      | 30            | 2              |                           |                             |
| Kedougou              | 29            | 14             |                           |                             |
| Singapore             | 24            | 14             |                           |                             |
| Dublin                | 23            | 4              |                           |                             |
| Isangi                | 20            | 7              |                           |                             |
| Senftenberg           | 19            | 17             |                           |                             |
| Brunei                | 18            | 11             | 1 (1)                     | 1 (1)                       |
| Paratyphi A           | 16            | 5              |                           |                             |
| Uganda                | 16            | 6              |                           |                             |
| Havana                | 15            | 7              |                           |                             |
| Haifa                 | 12            | 2              |                           |                             |
| Seremban              | 12            | 4              |                           |                             |
| All 53 serotypes      | 218           | 137            |                           |                             |
| <b>Total</b>          | <b>18,280</b> | <b>2,779</b>   | <b>110 (48)</b>           | <b>44 (19)</b>              |

doi:10.1371/journal.pone.0095772.t001

### Antimicrobial resistance in the isolates from pigs and humans with common PFGE types

Nineteen of 44 PFGE types found in pig isolates were detected in the human isolates. The 19 PFGE types were found in a total of 2,706 human isolates and accounted for 14.8% of the collection of

isolates from hospitals between 2004 and 2012. The resistance patterns were compared between the isolates from pigs and humans with common PFGE types (Table 2). The resistance patterns for the isolates from both sources were either identical or highly similar. Of the 19 common PFGE types, 13 had at least one

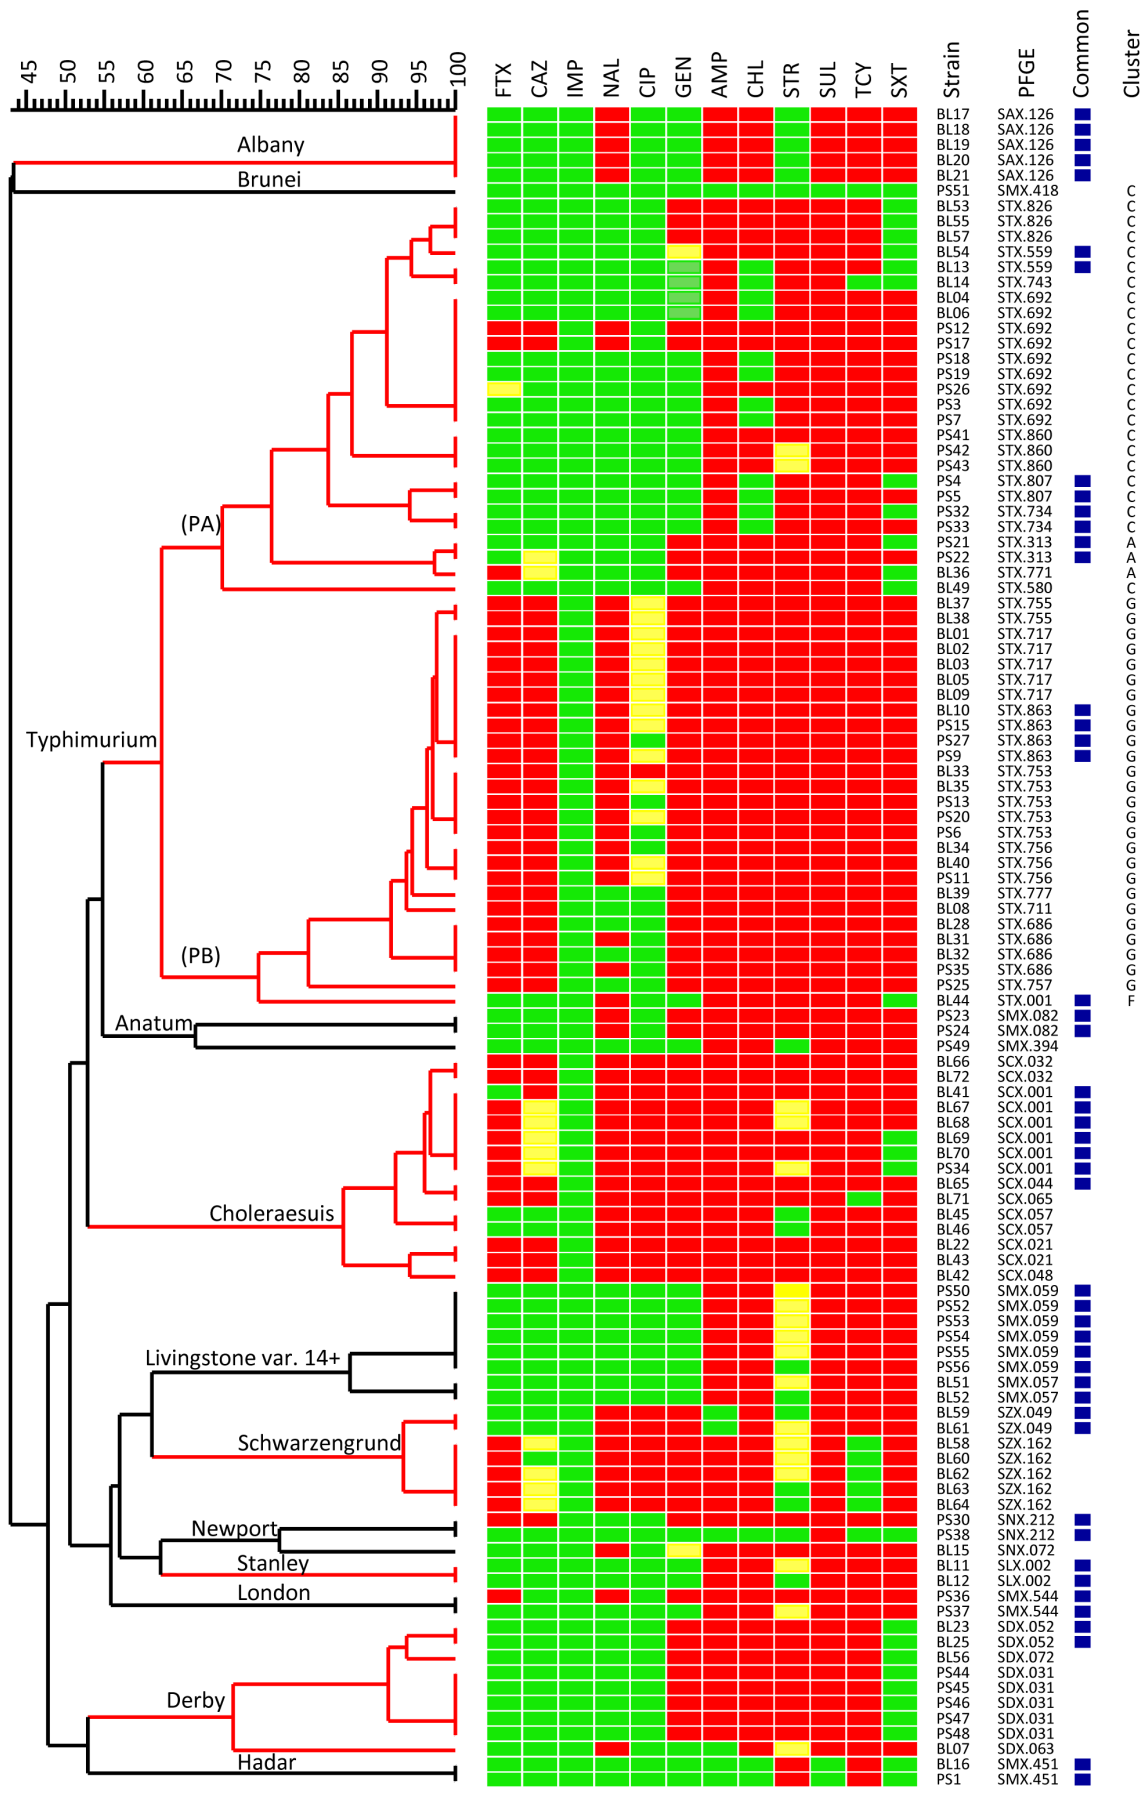

**Figure 1. Dendrogram constructed using the PFGE patterns of 110 *Salmonella enterica* isolates from pigs and the corresponding antimicrobial susceptibility patterns to the 12 indicated antimicrobials.** The dendrogram was constructed using the unweighted pair group method with an arithmetic mean algorithm. The antimicrobials shown in the sequence are cefotaxime (FTX), ceftazidime (CAZ), imipenem (IMP), nalidixic acid (NAL), ciprofloxacin (CIP), gentamicin (GEN), ampicillin (AMP), chloramphenicol (CHL), streptomycin (STR), sulfamethoxazole (SUL), tetracycline (TCY), and trimethoprim/sulfamethoxazole (SXT). "Resistance" is indicated by a red rectangle, "intermediate resistance" by a yellow rectangle, and "susceptibility" by a green rectangle. PFGE patterns shared by *Salmonella* isolates from human and pig are marked by blue squares. *S. Typhimurium* isolates are indicated with the clusters A, C, G and F, which were designated in a previous study [10]. doi:10.1371/journal.pone.0095772.g001

common resistance pattern found in the isolates from both pigs and humans. The majority of isolates were MDR; 16 PFGE types had consensus patterns with resistance to 4 or more classes of antimicrobials. Seven of 9 *S. Hadar* isolates with the SMX.451 PFGE type from both sources were resistant to only 2 antimicrobials. Seven *S. Brunei* isolates with the SMX.418 PFGE type, 3 *S. Newport* isolates with the SNX.212 PFGE type obtained from humans, and one pig isolate with the SNX.212 PFGE type were pan-susceptible. One *S. Newport* isolate with the SNX.212 PFGE type obtained from pigs exhibited acquired resistance to 9 antimicrobials. When compared to human isolates, some pig isolates displayed acquired resistance to additional antimicrobials. For example, a *S. Choleraesuis* isolate of the SCX.044 type obtained from pigs exhibited additional resistance to cefotaxime and ceftazidime and one of the two *S. London* isolates had developed resistance to 4 additional antimicrobials (Table 2). However, a human *S. Typhimurium* isolate with the STX.313 PFGE type was resistant to 3 additional antimicrobials when compared to the two pigs isolates (Table 2).

## Discussion

Our data show that all of the 12 serovars identified among the 110 pig *Salmonella* isolates are prevalent in the human clinical isolates obtained in Taiwan between 2004 and 2012. Of the 110 isolates from pigs, 44% shared PFGE patterns with the human isolates. The 19 common PFGE patterns are found in 14.8% of human isolates. Almost all of the pig *Salmonella* isolates were MDR and the resistance patterns for the isolates with common PFGE patterns from pigs and humans were either identical or highly similar. These data suggest a close relationship between *Salmonella* strains from pigs and humans. In this study, only a small number of isolates from pigs were compared. If more pig isolates were investigated, more common PFGE patterns would be identified and the ratio of *Salmonella* strains from pigs associated with human salmonellosis would be higher.

Sandt et al. [7] compare the 20 most common human *Salmonella* PFGE patterns and antimicrobial susceptibility patterns in *Salmonella* isolates from cattle, chickens, pigs, and turkeys to investigate the relationship between *Salmonella* causing human infections and their food animal reservoirs. Their findings indicate that chickens are major contributors to human salmonellosis in the northeastern United States. The data also show that the *Salmonella* isolates have a low MDR rate. In another study, we compared the genotypes and antimicrobial susceptibility patterns in *Salmonella* isolates from chickens, pigs, ducks, geese, and turkeys with those from humans. The study shows that pigs and chickens rank as the first and the second major contributors of MDR *Salmonella* with regard to human infections in Taiwan (unpublished data).

Astonishingly, 96% of the 110 pig *Salmonella* isolates were MDR, and 47% of them were resistant to 8 or more of the 12 antimicrobials tested. Some of the MDR strains have been the major causes of human infections in Taiwan. Strains of *S. Choleraesuis* are one of them. *S. Choleraesuis* is host-adapted to swine, and it rarely causes infection in humans [8]; however, it is extremely invasive and results in high mortality rates in humans

[13,14]. The epidemiologic profiles are quite different in some Asian countries. *S. Choleraesuis* was the 11<sup>th</sup> most common serovar responsible for human infections in Thailand between 1993 and 2002 [15]. In Taiwan, *S. Choleraesuis* was the second most common serovar in human *Salmonella* isolates in the 1990s [14]. Our surveillance data indicate that *S. Choleraesuis* was still highly prevalent in Taiwan in 2004: it accounted for 4.4% of the collection and ranked as the 5<sup>th</sup> most common serovar that year. The proportion of this serovar has decreased since 2005: it accounted for only 1.5% of the collection between 2004 and 2012 (Table 1). One previous study conducted by our laboratory indicated that the *S. Choleraesuis* epidemic in humans and swine was likely caused by a common clone and that the majority of *S. Choleraesuis* isolates were MDR [16]. Fluoroquinolone-resistant *S. Choleraesuis* strains, which most likely evolved from the major clone, emerged in 2000 and caused widespread infections among humans and pigs [16,17]. Resistance to extended-spectrum cephalosporins has been frequently detected in *S. Choleraesuis*. The increase of the resistance was likely due to the transmission of the *ampC* gene *bla*<sub>CMY-2</sub> [18,19].

*S. Typhimurium* is the second most common serovar among the isolates collected from hospitals in Taiwan between 2004 and 2012 (Table 1). A previous study showed that human *S. Typhimurium* isolates from Taiwan displayed high resistance rates to nalidixic acid, gentamicin, chloramphenicol, and trimethoprim/sulfamethoxazole, and extremely high resistance rates to ampicillin, streptomycin, sulfamethoxazole, and tetracycline [10]. When compared to the isolates collected from Denmark, the isolates from Taiwan display significantly higher resistance rates to 11 of the 12 tested antimicrobials. In that study, 7 genetic clusters (A–G) were designated, and a high percentage of the isolates in genetic clusters C, F and G were MDR. In the present study, the pig *S. Typhimurium* isolates fall into two distinct clusters: PA and PB (Figure 1). The isolates are compared with the 378 isolates assayed by the previous study. By clustering analysis of the PFGE patterns, all but 3 isolates in cluster PA are grouped tightly with those in cluster C, and these strains are typically resistant to ASSuT (data not shown). The ASSuT-resistant clone, which likely originated in pigs [20], was first identified in Italy and has spread globally [21,22]. The majority of ASSuT-resistant human isolates belonged to the PFGE types STX.559 and STX.734. In Taiwan, the STX.559 type was first detected in 2008 and has now become prevalent in Taiwan. STX.734 was predominant in the ASSuT-resistant isolates from Denmark and was first detected in 2010 in Taiwan. STX.734 is now common in Taiwan. In this study, both STX.559 and STX.734 were detected in pig isolates. Obviously, the ASSuT-resistant clone has expanded, and some strains have acquired additional resistance to cefotaxime, ceftazidime, nalidixic acid, gentamicin, chloramphenicol, and trimethoprim (Figure 1). All but one isolate in cluster PB are clustered with those isolates found in cluster G which are characterized as bearing resistance to more than 5 antimicrobials and are likely unique to Taiwan. In this study, all of the pig isolates belonging to cluster G are resistant to 9–11 of the antimicrobials tested (Figure 1). The pig isolates in cluster G are very closely related. One PFGE type (STX.863) was detected in human isolates indicating that pigs are likely the

**Table 2.** Antimicrobial susceptibility of *Salmonella* isolates with common PFGE types isolated from pigs and humans.

| PFGE type                   | No. isolates (with AST data) |           | Consensus resistance pattern <sup>1</sup> | FTX         | CAZ         | IMP         | NAL           | CIP           | GEN           | AMP           | CHL           | STR32         | SUL           | TCY           | SXT           |
|-----------------------------|------------------------------|-----------|-------------------------------------------|-------------|-------------|-------------|---------------|---------------|---------------|---------------|---------------|---------------|---------------|---------------|---------------|
|                             | Human                        | Pig       |                                           |             |             |             |               |               |               |               |               |               |               |               |               |
| <b>Albany</b>               | <b>722</b>                   | <b>5</b>  |                                           |             |             |             |               |               |               |               |               |               |               |               |               |
| SAX.126                     | 21 (10)                      | 5 (5)     | S-S-S-R-S-R-R-S-R-R-R                     | 0.0 (0.0)   | 0.0 (0.0)   | 0.0 (0.0)   | 100.0 (100.0) | 0.0 (0.0)     | 0.0 (0.0)     | 100.0 (100.0) | 100.0 (100.0) | 20.0 (0.0)    | 100.0 (100.0) | 100.0 (100.0) | 100.0 (100.0) |
| <b>Anatum</b>               | <b>80</b>                    | <b>3</b>  |                                           |             |             |             |               |               |               |               |               |               |               |               |               |
| SMX.082                     | 28 (27)                      | 2 (2)     | S-S-S-R-S-R-S-R-R-R-R                     | 0.0 (0.0)   | 0.0 (0.0)   | 0.0 (0.0)   | 85.2 (100.0)  | 0.0 (0.0)     | 22.2 (100.0)  | 74.1 (100.0)  | 44.4 (100.0)  | 40.7 (100.0)  | 70.4 (100.0)  | 74.1 (100.0)  | 70.4 (100.0)  |
| <b>Brunei</b>               | <b>18</b>                    | <b>1</b>  |                                           |             |             |             |               |               |               |               |               |               |               |               |               |
| SMX.418                     | 6 (6)                        | 1 (1)     | S-S-S-S-S-S-S-S-S-S-S                     | 0.0 (0.0)   | 0.0 (0.0)   | 0.0 (0.0)   | 0.0 (0.0)     | 0.0 (0.0)     | 0.0 (0.0)     | 0.0 (0.0)     | 0.0 (0.0)     | 0.0 (0.0)     | 0.0 (0.0)     | 0.0 (0.0)     | 0.0 (0.0)     |
| <b>Choleraesuis</b>         | <b>276</b>                   | <b>15</b> |                                           |             |             |             |               |               |               |               |               |               |               |               |               |
| SCX.001                     | 159 (157)                    | 6 (6)     | S-S-S-R-R-R-R-R-R-R-R                     | 5.1 (83.3)  | 5.6 (16.7)  | 0.0 (0.0)   | 97.5 (100.0)  | 83.4 (100.0)  | 61.1 (100.0)  | 82.2 (100.0)  | 83.4 (100.0)  | 81.5 (50.0)   | 98.1 (100.0)  | 89.8 (100.0)  | 77.7 (50.0)   |
| SCX.044                     | 6 (5)                        | 1 (1)     | S-S-S-R-R-R-R-R-R-R-R                     | 0.0 (100.0) | 0.0 (100.0) | 0.0 (100.0) | 100.0 (100.0) | 100.0 (100.0) | 100.0 (100.0) | 100.0 (100.0) | 100.0 (100.0) | 100.0 (100.0) | 100.0 (100.0) | 100.0 (100.0) | 100.0 (100.0) |
| <b>Derby</b>                | <b>452</b>                   | <b>9</b>  |                                           |             |             |             |               |               |               |               |               |               |               |               |               |
| SDX.052                     | 16 (11)                      | 2 (2)     | S-S-S-S-R-R-R-R-R-R-S                     | 0.0 (0.0)   | 0.0 (0.0)   | 0.0 (0.0)   | 9.1 (0.0)     | 0.0 (0.0)     | 72.7 (100.0)  | 100.0 (100.0) | 100.0 (100.0) | 100.0 (100.0) | 100.0 (100.0) | 100.0 (100.0) | 0.0 (0.0)     |
| <b>Hadar</b>                | <b>247</b>                   | <b>2</b>  |                                           |             |             |             |               |               |               |               |               |               |               |               |               |
| SMX.451                     | 10 (7)                       | 2 (2)     | S-S-S-S-S-S-S-R-S-R-S                     | 0.0 (0.0)   | 0.0 (0.0)   | 0.0 (0.0)   | 0.0 (0.0)     | 0.0 (0.0)     | 0.0 (0.0)     | 14.3 (0.0)    | 14.3 (0.0)    | 85.7 (100.0)  | 14.3 (0.0)    | 85.7 (100.0)  | 14.3 (0.0)    |
| <b>Livingstone var. 14+</b> | <b>52</b>                    | <b>8</b>  |                                           |             |             |             |               |               |               |               |               |               |               |               |               |
| SMX.057                     | 2 (1)                        | 2 (2)     | S-S-S-S-S-R-R-S-R-R-R                     | 0.0 (0.0)   | 0.0 (0.0)   | 0.0 (0.0)   | 0.0 (0.0)     | 0.0 (0.0)     | 0.0 (0.0)     | 100.0 (100.0) | 100.0 (100.0) | 0.0 (0.0)     | 100.0 (100.0) | 100.0 (100.0) | 100.0 (100.0) |
| SMX.059                     | 13 (5)                       | 6 (6)     | S-S-S-S-S-R-R-S-R-R-R                     | 0.0 (0.0)   | 0.0 (0.0)   | 0.0 (0.0)   | 0.0 (0.0)     | 0.0 (0.0)     | 0.0 (0.0)     | 100.0 (100.0) | 100.0 (100.0) | 0.0 (0.0)     | 100.0 (100.0) | 100.0 (100.0) | 100.0 (100.0) |
| <b>London</b>               | <b>46</b>                    | <b>2</b>  |                                           |             |             |             |               |               |               |               |               |               |               |               |               |
| SMX.544                     | 2 (2)                        | 2 (2)     | S-S-S-S-S-R-R-S-R-R-R                     | 0.0 (50.0)  | 0.0 (0.0)   | 0.0 (0.0)   | 0.0 (50.0)    | 0.0 (0.0)     | 0.0 (50.0)    | 100.0 (100.0) | 100.0 (100.0) | 0.0 (50.0)    | 100.0 (100.0) | 100.0 (100.0) | 100.0 (100.0) |
| <b>Newport</b>              | <b>1,254</b>                 | <b>3</b>  |                                           |             |             |             |               |               |               |               |               |               |               |               |               |
| SNX.212                     | 4 (3)                        | 2 (2)     | S-S-S-S-S-S-S-S-S-S-S                     | 0.0 (50.0)  | 0.0 (50.0)  | 0.0 (0.0)   | 0.0 (0.0)     | 0.0 (0.0)     | 0.0 (50.0)    | 0.0 (50.0)    | 0.0 (50.0)    | 0.0 (50.0)    | 0.0 (50.0)    | 0.0 (50.0)    | 0.0 (50.0)    |
| <b>Schwarzengrund</b>       | <b>325</b>                   | <b>7</b>  |                                           |             |             |             |               |               |               |               |               |               |               |               |               |
| SZX.049                     | 4 (4)                        | 2 (2)     | S-S-S-R-R-R-S-R-S-R-R-R                   | 0.0 (0.0)   | 0.0 (0.0)   | 0.0 (0.0)   | 100.0 (100.0) | 100.0 (100.0) | 83.3 (100.0)  | 66.7 (0.0)    | 100.0 (100.0) | 50.0 (0.0)    | 100.0 (100.0) | 100.0 (100.0) | 83.3 (100.0)  |
| <b>Stanley</b>              | <b>1,531</b>                 | <b>2</b>  |                                           |             |             |             |               |               |               |               |               |               |               |               |               |
| SLX.002                     | 923 (884)                    | 2 (2)     | S-S-S-S-S-R-R-S-R-R-R                     | 2.5 (0.0)   | 2.1 (0.0)   | 0.0 (0.0)   | 1.0 (0.0)     | 0.0 (0.0)     | 0.3 (0.0)     | 73.5 (100.0)  | 99.0 (100.0)  | 17.5 (0.0)    | 99.2 (100.0)  | 99.3 (100.0)  | 98.5 (100.0)  |
| <b>Typhimurium</b>          | <b>4,184</b>                 | <b>53</b> |                                           |             |             |             |               |               |               |               |               |               |               |               |               |

Table 2. Cont.

| PFGE type | No. isolates (with AST data) |           | Consensus resistance pattern <sup>1</sup> | Resistance patterns |               |           |               |               |               |               |               |               |               |               |              |  |  |
|-----------|------------------------------|-----------|-------------------------------------------|---------------------|---------------|-----------|---------------|---------------|---------------|---------------|---------------|---------------|---------------|---------------|--------------|--|--|
|           | Human                        | Pig       |                                           | FTX                 | CAZ           | IMP       | NAL           | CIP           | GEN           | AMP           | CHL           | STR32         | SUL           | TCY           | SXT          |  |  |
| STX.001   | 1,189 (1,138)                | 1 (1)     | S-S-S-R-S-S-R-R-R-R-R-S                   | 1.1 (0.0)           | 1.0 (0.0)     | 0.0 (0.0) | 51.0 (100.0)  | 0.0 (0.0)     | 0.4 (0.0)     | 97.0 (100.0)  | 94.7 (100.0)  | 95.1 (100.0)  | 98.3 (100.0)  | 96.0 (100.0)  | 2.0 (0.0)    |  |  |
| STX.313   | 1 (1)                        | 2 (2)     | S-S-S-S-S-R-R-R-R-R-R-R                   | 100.0 (0.0)         | 100.0 (0.0)   | 0.0 (0.0) | 100.0 (0.0)   | 100.0 (100.0) | 100.0 (100.0) | 100.0 (100.0) | 100.0 (100.0) | 100.0 (100.0) | 100.0 (100.0) | 100.0 (100.0) | 100.0 (50.0) |  |  |
| STX.559   | 237 (180)                    | 2 (2)     | S-S-S-S-S-S-R-S-R-R-R-S                   | 0.0 (0.0)           | 0.0 (0.0)     | 0.0 (0.0) | 1.1 (0.0)     | 0.6 (0.0)     | 95.6 (100.0)  | 1.1 (50.0)    | 95.6 (100.0)  | 95.0 (100.0)  | 97.8 (100.0)  | 1.1 (0.0)     |              |  |  |
| STX.734   | 40 (2)                       | 2 (2)     | S-S-S-S-S-S-R-S-R-R-R-S                   | 0.0 (0.0)           | 0.0 (0.0)     | 0.0 (0.0) | 0.0 (0.0)     | 0.0 (0.0)     | 100.0 (100.0) | 0.0 (0.0)     | 100.0 (100.0) | 100.0 (100.0) | 100.0 (100.0) | 0.0 (50.0)    |              |  |  |
| STX.807   | 44 (1)                       | 2 (2)     | S-S-S-S-S-S-R-S-R-R-R-S                   | 0.0 (0.0)           | 0.0 (0.0)     | 0.0 (0.0) | 0.0 (0.0)     | 0.0 (0.0)     | 100.0 (100.0) | 0.0 (0.0)     | 100.0 (100.0) | 100.0 (100.0) | 100.0 (100.0) | 0.0 (50.0)    |              |  |  |
| STX.863   | 1 (1)                        | 4 (4)     | R-R-S-R-S-R-R-R-R-R-R-R                   | 100.0 (100.0)       | 100.0 (100.0) | 0.0 (0.0) | 100.0 (100.0) | 100.0 (100.0) | 100.0 (100.0) | 100.0 (100.0) | 100.0 (100.0) | 100.0 (100.0) | 100.0 (100.0) | 100.0 (100.0) |              |  |  |
| Total     | 2,706 (2,445)                | 110 (110) |                                           | 1.8 (25.0)          | 11.6 (14.6)   | 0.0 (0.0) | 32.4 (45.8)   | 5.7 (18.8)    | 5.3 (43.8)    | 86.7 (87.5)   | 87.5 (81.2)   | 64.8 (52.1)   | 97.5 (93.8)   | 96.4 (43.5)   | 43.5 (68.8)  |  |  |

<sup>1</sup>The antimicrobials in the sequence (FTX-CAZ-IMP-NAL-CIP-GEN-CAMP-CHL-STR32-SUL-TCY-SXT) are cefotaxime (FTX), ceftazidime (CAZ), imipenem (IMP), nalidixic acid (NAL), ciprofloxacin (CIP), gentamicin (GEN), ampicillin (AMP), chloramphenicol (CHL), streptomycin (STR32), sulfamethoxazole (SUL), tetracycline (TCY), and trimethoprim/sulfamethoxazole (SXT). R, resistance; I, intermediate resistance; S, susceptibility. doi:10.1371/journal.pone.0095772.t002

reservoir of clone G. However, we also identified strains of clone G isolated from chickens, turkeys, and geese (data not shown). The strains present in turkeys and geese have similar resistance patterns to those clone G strains isolated from pigs and humans. It is very unfortunate that this MDR clone has become widespread among the major food animal stocks in Taiwan.

*S. Schwarzengrund* is the 12<sup>th</sup> most common serovar and accounts for 1.8% of the collection of human isolates (Table 1). Poultry and swine are the primary reservoirs of this serovar [15,23–25]. *S. Schwarzengrund* is one of the most invasive serovars, it, together with *S. Choleraesuis*, *S. Typhimurium*, and *S. Enteritidis*, accounted for approximately 70% of invasive salmonellosis in Taiwan between 1998 and 2002 [9]. International spread of MDR *S. Schwarzengrund* has become a great concern issue. Transmission of this serovar across country borders most likely occurs through international trade of food products, mainly poultry meat and pork [26]. A *Salmonella* surveillance study performed in Taiwan from 2001 to 2005 showed that *S. Schwarzengrund* and *S. Albany* were the most prevalent serovars found in chicken meat obtained from wet markets, and all of the chicken meat isolates and human isolates included for comparison were MDR and displayed a high prevalence of resistance to ampicillin, gentamicin, kanamycin, streptomycin, tetracycline, nalidixic acid, trimethoprim-sulfamethoxazole, and chloramphenicol [23]. Studies by comparing the genotypes of isolates from chickens, turkeys, pigs, and humans suggest that the transmission of *S. Schwarzengrund* from food products to humans is possible [26,27]. Our data also show a connection between the *S. Schwarzengrund* MDR isolates from pigs and humans.

*S. Albany* is detected primarily in poultry and not a prevalent serovar among clinical isolates in the USA and Thailand [8,15,28,29]. This serovar was unusually prevalent in Taiwan, and it ranked as the 5<sup>th</sup> most common serovar for human salmonellosis between 2004 and 2012 (Table 1). Our data indicate that the 15 *S. Albany* isolates of the SAX.126 type from pigs and humans are all resistant to ampicillin, chloramphenicol, sulfamethoxazole, tetracyclines, trimethoprim, and nalidixic acid (Table 2). These isolates could carry the *Salmonella* genomic island SG11-F that confers resistance to the first 5 antimicrobials [30]. Of the 678 human *S. Albany* isolates in our database that contain AST data, 652 (96%) are resistant to the 5 antimicrobials mediated by the presence of SG11-F and 604 (89%) are also resistant to nalidixic acid. The highly consistent resistance patterns among the isolates from pigs and humans suggest that the *S. Albany* strains circulating in Taiwan could have been derived from clonal expansion of a SG11-F-carrying strain.

*S. Livingstone* is primarily detected in chicken and swine samples [8,31,32]. It was not a prevalent serovar in human salmonellosis in Taiwan between 2004 and 2012 (Table 1), but human infections with this serovar have increased since 2010. The two PFGE types SMX.057 and SMX.059 were found in isolates from both humans and pigs and were first detected in humans in 2010. The incidence of the SMX.059 type significantly increased in 2012. SMX.057 and SMX.059 isolates from both sources are MDR, while the majority of isolates with other PFGE types are pan-susceptible. Thus, pigs could be one of the major reservoirs of MDR *S. Livingstone* for human infections in Taiwan.

*S. Derby* is a prevalent serovar among *Salmonella* isolates obtained from food animals and humans [8,25,28,33]. This serovar displays a high prevalence of MDR. Of the 418 *S. Derby* isolates with AST data in our database, 304 (73%) are MDR and primarily exhibit resistance to sulfamethoxazole, streptomycin, and tetracycline. Approximately 20% to 40% of the isolates have developed additional resistance to ampicillin, chloramphenicol,

nalidixic acid, and trimethoprim, and approximately 3% of these isolates are also resistant to cefotaxime, ceftazidime, and gentamicin.

In conclusion, *Salmonella* isolates recovered from sick pigs belonged to 12 frequently identified serovars for human salmonellosis in Taiwan between 2004 and 2012. It is notable that almost all of the pig *Salmonella* isolates are MDR and that 47% are resistant to 8 or more antimicrobials tested. The isolates from pigs and humans with a common PFGE pattern had either identical or very similar resistance patterns. *S. enterica* strains which can cause severe invasive infections in pigs could also be a major cause for human salmonellosis in Taiwan. Thus, pigs could serve as the

principal *Salmonella* reservoirs for human salmonellosis. The agriculture sector must face this severe problem and implement effective measures to control *Salmonella* infection in pig farms and strictly regulate the use of antimicrobials.

## Author Contributions

Conceived and designed the experiments: CSC HCK. Performed the experiments: TLL DYL CLC PCC SYL JCK YSL CHL CST. Analyzed the data: CSC HCK. Contributed reagents/materials/analysis tools: CSC HCK DYL CLC. Wrote the paper: CSC TLL.

## References

- Majowicz SE, Musto J, Scallan E, Angulo FJ, Kirk M, et al. (2010) The global burden of nontyphoidal *Salmonella* gastroenteritis. *Clin Infect Dis* 50: 882–889.
- Scallan E, Hoekstra RM, Angulo FJ, Tauxe RV, Widdowson MA, et al. (2011) Foodborne illness acquired in the United States—major pathogens. *Emerg Infect Dis* 17: 7–15.
- Stevens MP, Humphrey TJ, Maskell DJ (2009) Molecular insights into farm animal and zoonotic *Salmonella* infections. *Philos Trans R Soc Lond B Biol Sci* 364: 2709–2723.
- Marshall BM, Levy SB (2011) Food animals and antimicrobials: impacts on human health. *Clin Microbiol Rev* 24: 718–733.
- Swaminathan B, Barrett TJ, Hunter SB, Tauxe RV (2001) PulseNet: the molecular subtyping network for foodborne bacterial disease surveillance, United States. *Emerg Infect Dis* 7: 382–389.
- Swaminathan B, Gerner-Smidt P, Ng LK, Lukinmaa S, Kam KM, et al. (2006) Building PulseNet International: an interconnected system of laboratory networks to facilitate timely public health recognition and response to foodborne disease outbreaks and emerging foodborne diseases. *Foodborne Pathog Dis* 3: 36–50.
- Sandt CH, Fedorka-Cray PJ, Tewari D, Ostroff S, Joyce K, et al. (2013) A comparison of non-typhoidal *Salmonella* from humans and food animals using pulsed-field gel electrophoresis and antimicrobial susceptibility patterns. *Plos One* 8: e77836. doi:77810.71371/journal.pone.0077836.
- Centers for Disease Control and Prevention (2013) National *Salmonella* Surveillance Annual Report — Appendices, 2011. Atlanta, Georgia: US Department of Health and Human Services, CDC.
- Lauderdale TL, Aarestrup FM, Chen PC, Lai JF, Wang HY, et al. (2006) Multidrug resistance among different serotypes of clinical *Salmonella* isolates in Taiwan. *Diagn Microbiol Infect Dis* 55: 149–155.
- Torp Dahl M, Lauderdale TL, Liang SY, Li I, Wei SH, et al. (2013) Human isolates of *Salmonella enterica* serovar Typhimurium from Taiwan displayed significantly higher levels of antimicrobial resistance than those from Denmark. *Int J Food Microbiol* 161: 69–75.
- Ribot EM, Fair MA, Gautam R, Cameron DN, Hunter SB, et al. (2006) Standardization of Pulsed-Field Gel Electrophoresis Protocols for the subtyping of *Escherichia coli* O157:H7, *Salmonella*, and *Shigella* for PulseNet. *Foodborne Pathog Dis* 3: 59–67.
- Clinical and Laboratory Standards Institute (CLSI) (2013) Performance Standards for Antimicrobial Susceptibility Testing; Twenty-Third Informational Supplement. CLSI document M100-S23. Wayne, PA: Clinical and Laboratory Standards Institute.
- Chiu S, Chiu CH, Lin TY (2004) *Salmonella enterica* serotype Choleraesuis infection in a medical center in northern Taiwan. *J Microbiol Immunol Infect* 37: 99–102.
- Chiu CH, Su LH, Chu C (2004) *Salmonella enterica* serotype Choleraesuis: epidemiology, pathogenesis, clinical disease, and treatment. *Clin Microbiol Rev* 17: 311–322.
- Bangtrakulnonth A, Pornreongwong S, Pulsrikarn C, Sawanpanyalert P, Hendriksen RS, et al. (2004) *Salmonella* serovars from humans and other sources in Thailand, 1993–2002. *Emerg Infect Dis* 10: 131–136.
- Chang CC, Lin YH, Chang CF, Yeh KS, Chiu CH, et al. (2005) Epidemiologic relationship between fluoroquinolone-resistant *Salmonella enterica* Serovar Choleraesuis strains isolated from humans and pigs in Taiwan (1997 to 2002). *J Clin Microbiol* 43: 2798–2804.
- Chiu CH, Wu TL, Su LH, Chu C, Chia JH, et al. (2002) The emergence in Taiwan of fluoroquinolone resistance in *Salmonella enterica* serotype Choleraesuis. *N Engl J Med* 346: 413–419.
- Yan JJ, Chiou CS, Lauderdale TL, Tsai SH, Wu JJ (2005) Cephalosporin and ciprofloxacin resistance in *Salmonella*, Taiwan. *Emerg Infect Dis* 11: 947–950.
- Chiu CH, Su LH, Chu C, Chia JH, Wu TL, et al. (2004) Isolation of *Salmonella enterica* serotype Choleraesuis resistant to ceftriaxone and ciprofloxacin. *Lancet* 363: 1285–1286.
- Rasschaert G, Michiels J, Arijs D, Wildemauew C, De Smet S, et al. (2012) Effect of farm type on within-herd *Salmonella* prevalence, serovar distribution, and antimicrobial resistance. *J Food Prot* 75: 859–866.
- Hopkins KL, Kirchner M, Guerra B, Granier SA, Lucarelli C, et al. (2010) Multiresistant *Salmonella enterica* serovar 4,[5],12:i:- in Europe: a new pandemic strain? *Euro Surveill* 15: 19580.
- Lucarelli C, Dionisi AM, Torpdahl M, Villa L, Graziani C, et al. (2010) Evidence for a second genomic island conferring multidrug resistance in a clonal group of strains of *Salmonella enterica* serovar Typhimurium and its monophasic variant circulating in Italy, Denmark, and the United Kingdom. *J Clin Microbiol* 48: 2103–2109.
- Chen MH, Wang SW, Hwang WZ, Tsai SJ, Hsieh YC, et al. (2010) Contamination of *Salmonella* Schwarzengrund cells in chicken meat from traditional marketplaces in Taiwan and comparison of their antibiograms with those of the human isolates. *Poult Sci* 89: 359–365.
- Poppe C, Irwin RJ, Messier S, Finley GG, Oggel J (1991) The prevalence of *Salmonella* Enteritidis and other *Salmonella* sp. among Canadian registered commercial chicken broiler flocks. *Epidemiol Infect* 107: 201–211.
- Chen TH, Wang YC, Chen YT, Yang CH, Yeh KS (2006) Serotype occurrence and antimicrobial susceptibility of *Salmonella* isolates recovered from pork carcasses in Taiwan (2000 through 2003). *J Food Prot* 69: 674–678.
- Aarestrup FM, Hendriksen RS, Lockett J, Gay K, Teates K, et al. (2007) International spread of multidrug-resistant *Salmonella* Schwarzengrund in food products. *Emerg Infect Dis* 13: 726–731.
- Chen M-H, Chiou C-S, Chiang Y-C, Chen P-H, Tsai S-W, et al. (2012) Comparison of the pulsed field gel electrophoresis patterns and virulence profiles of the multidrug resistant strains of *Salmonella enterica* serovar Schwarzengrund isolated from chicken meat and humans in Taiwan. *Food Research International* 45: 978–983.
- Thai TH, Hirai T, Lan NT, Yamaguchi R (2012) Antibiotic resistance profiles of *Salmonella* serovars isolated from retail pork and chicken meat in North Vietnam. *Int J Food Microbiol* 156: 147–151.
- Su YC, Yu CY, Lin JL, Lai JM, Chen SW, et al. (2011) Emergence of *Salmonella enterica* serovar Potsdam as a major serovar in waterfowl hatcheries and chicken eggs. *Avian Dis* 55: 217–222.
- Doublet B, Lailier R, Meunier D, Brisabois A, Boyd D, et al. (2003) Variant *Salmonella* genomic island 1 antibiotic resistance gene cluster in *Salmonella enterica* serovar Albany. *Emerg Infect Dis* 9: 585–591.
- Murase T, Senjyu K, Maeda T, Tanaka M, Sakae H, et al. (2001) Monitoring of chicken houses and an attached egg-processing facility in a laying farm for *Salmonella* contamination between 1994 and 1998. *J Food Prot* 64: 1912–1916.
- Botteldoorn N, Heyndrickx M, Rijpens N, Grijspeerdt K, Herman L (2003) *Salmonella* on pig carcasses: positive pigs and cross contamination in the slaughterhouse. *J Appl Microbiol* 95: 891–903.
- Chen YH, Chen TP, Tsai JJ, Hwang KP, Lu PL, et al. (1999) Epidemiological study of human salmonellosis during 1991–1996 in southern Taiwan. *Kaohsiung J Med Sci* 15: 127–136.
